# Supplementary material for: Galanin Signaling in the Brain Regulates Color Pattern Formation in Zebrafish
Source: PubMed Central journal article supplement — Curr Biol. 2020 Jan 20;30(2):298–303.e3. doi: 10.1016/j.cub.2019.11.033 (PMC6971688; doi:10.1016/j.cub.2019.11.033), 2020-01-20
Supplement: mmc1.pdf [file mmc1.pdf]

**Current Biology, Volume 30**

**Supplemental Information**

**Galanin Signaling in the Brain Regulates  
Color Pattern Formation in Zebrafish**

**Anastasia Eskova, Hans Georg Frohnhöfer, Christiane Nüsslein-Volhard, and Uwe Irion**

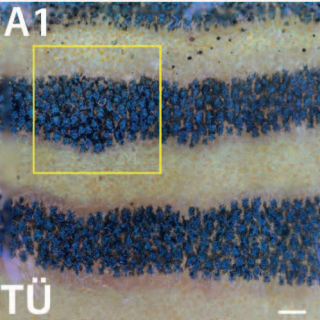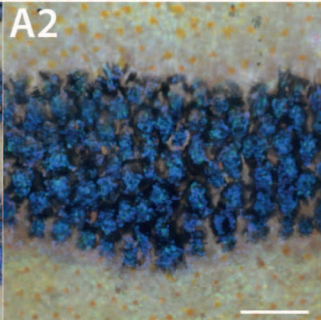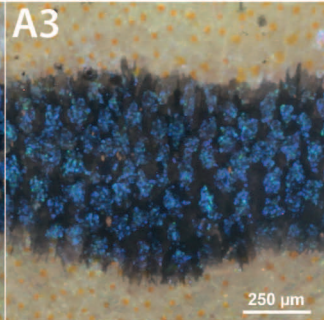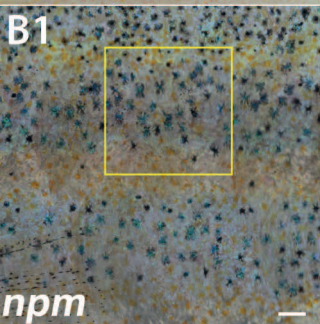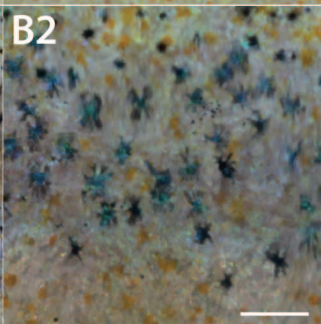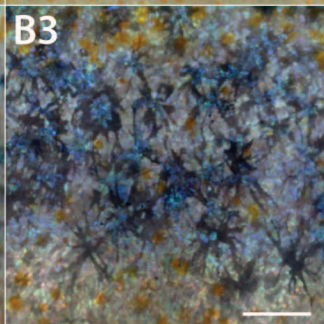

**Figure S1. Melanophore shape in *npm* mutants, Related to Figure 1.** In wild type (A) melanophores display a compact shape and fill the dark stripe area; melanosomes are strongly dispersed in the cells after short anaesthesia (2 min, A2), and fully dispersed after extended periods of anaesthesia (30 min, A3). In *npm* mutants (B) melanosomes only disperse after prolonged anaesthesia (B3) revealing a much more stellate shape of melanophores, and showing that they contact one another.

**A**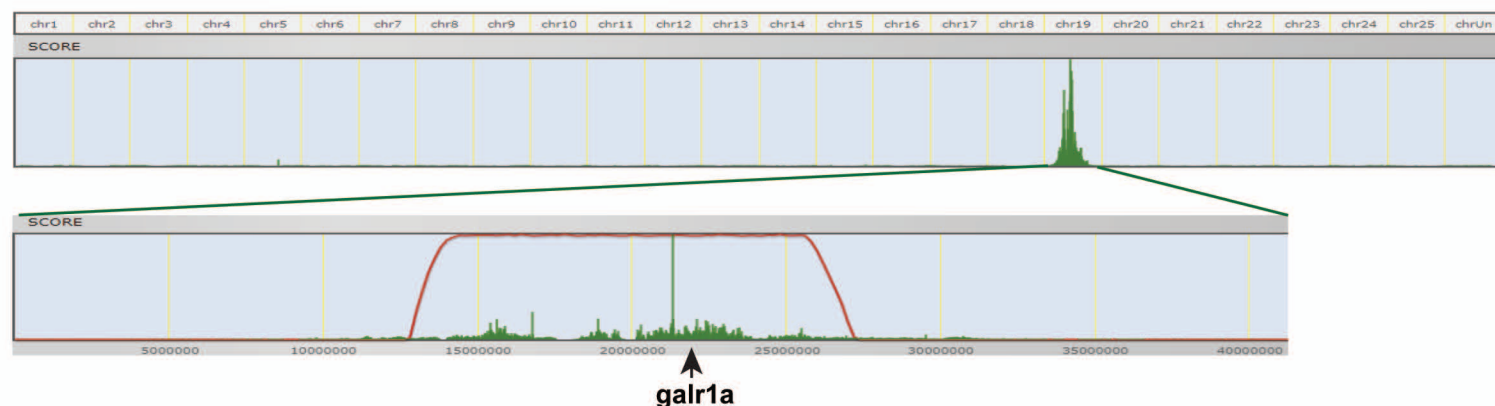**B**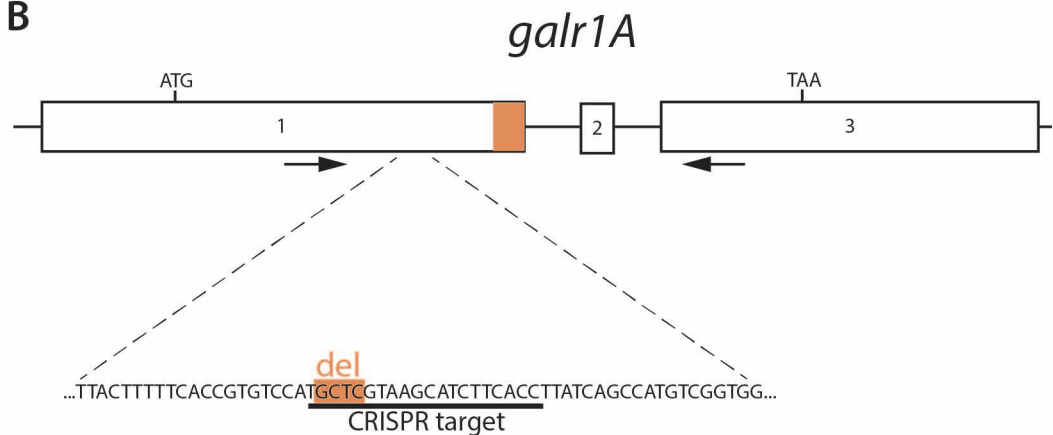**C**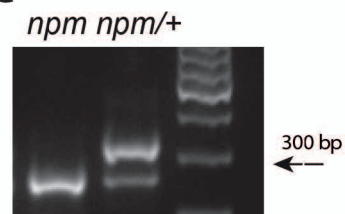**D**

|               |   |                                                                                                      |     |
|---------------|---|------------------------------------------------------------------------------------------------------|-----|
| GALR1_H.sap   | 1 | MELAVGNLSEGNASWPEPPAPEGPLFVGIVENFVTLVVFGLIFALGVLGNSLVITVLARSKPGKPRSTTNLFI LNLSIADLAYLLFCIPFQATVYALPT | 100 |
| Galr1a_D.rer  | 1 | MGTQNSDLDRPRSNI DLEAPEKN-LFGIGTDNLTLLIFGLIFTLGVLGNSLVITVLAQRKPGQQRSTTNIFILNLSVADLSYLLFCIPFQSTVYMLPT  | 99  |
| Galr1A in npm | 1 | MGTQNSDLDRPRSNI DLEAPEKN-LFGIGTDNLTLLIFGLIFTLGVLGNSLVITVLAQRKPGQQRSTTNIFILNLSVADLSYLLFCIPFQSTVYMLPT  | 99  |
| Galr1A_mut    | 1 | MGTQNSDLDRPRSNI DLEAPEKN-LFGIGTDNLTLLIFGLIFTLGVLGNSLVITVLAQRKPGQQRSTTNIFILNLSVADLSYLLFCIPFQSTVYMLPT  | 99  |

  

|               |     |                                                                                                       |     |
|---------------|-----|-------------------------------------------------------------------------------------------------------|-----|
| GALR1_H.sap   | 101 | WVLGAFICKFIHYFFTVSMLVSI FTLAAMSVDRYVAIVHSRRSSSLRVSRNALLGCVGIWALS IAMASPVAYHQGLFHPRASNTFCWEQWDPDRHKKAY | 200 |
| Galr1a_D.rer  | 100 | WILGAFICKFIHYFFTVSMLVSI FTLSAMSVDRYIAIVHCRKSSSIRVARHALIGVLVIWVLSFAMATPVAYYQGIVES-EDNSTFCWEVWPDHRRKIY  | 198 |
| Galr1A in npm | 100 | WILGAFICKFIHYFFTVSMLVSI FTLSAMSVDRYIAIVHCRKSSSIRVARHALIGVLVIWVLSFAMATPVAYYQGIVES-EDNSTFCWEVWPDHRRKIY  | 198 |
| Galr1A_mut    | 100 | WILGAFICKFIHYFFTVSM*                                                                                  | 118 |

  

|               |     |                                                                                                     |     |
|---------------|-----|-----------------------------------------------------------------------------------------------------|-----|
| GALR1_H.sap   | 201 | VVCTFVFGYLLPLLLFCYAKVLNHLHKKLNMSKKSEASKKTAQTVLVVVVVFGLISWLPHHI IHLWAEFGVFP LTPASF L RITAHCLAYSNSVNE | 300 |
| Galr1a_D.rer  | 199 | VVCTFVFGYVLP LLLSFCYAKVLNHLHKKLRNVSKSEASKKTAQTVLVVVVVFCLSWLPHHVHLWVEFGSFPLNQASFVLRVAACHCLAYSNSVNP   | 298 |
| Galr1A in npm | 199 | VV-----LNHLHKKLRNVSKSEASKKTAQTVLVVVVVFCLSWLPHHVHLWVEFGSFPLNQASFVLRVAACHCLAYSNSVNE                   | 277 |

  

|               |     |                                                   |     |
|---------------|-----|---------------------------------------------------|-----|
| GALR1_H.sap   | 301 | TIYAFLS ENFRKAYKQVFKCHIRKDSHLSDTKESKRIDTPPSTNCTHV | 349 |
| Galr1a_D.rer  | 299 | VIYAFLS ENFRQAYKQVFRQVASECPTNEAREMKSKEAAPSTNCTTV  | 347 |
| Galr1A in npm | 278 | VIYAFLS ENFRQAYKQVFRQVASECPTNEAREMKSKEAAPSTNCTTV  | 326 |

**E**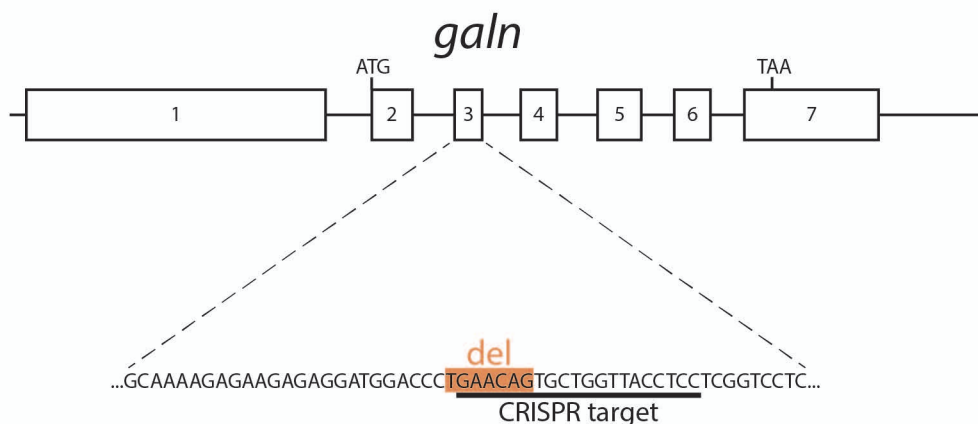**F**

|                   |   |                                                                         |    |
|-------------------|---|-------------------------------------------------------------------------|----|
| prepro-GALN H.sap | 1 | MARGSALLLASLLAAALSASAGLWSPAKEYRGWTLNSAGYLLGPHAVGNHRFSFDKNGLTSKREL RPED  | 70 |
| prepro-Galn D.rer | 1 | MHRCVGVCSLVIVCAFLTETLGMVIAAKEKRGWTLNSAGYLLGPH AIDSHRSLSDKHGLAGKREMP LDE | 70 |
| Galn_mut          | 1 | MHRCVGVCSLVIVCAFLTETLGMVIAAKEKRGWTLNSAGYLLGPH AIDSHRSLSDKHGLAGKREMP LDE | 70 |

  

|                   |    |                                                       |     |
|-------------------|----|-------------------------------------------------------|-----|
| prepro-GALN H.sap | 71 | DMKPGSFDRSIPENNIMRTIIEFLSFLHLKEAGALDRLLDLPAAASSEDIERS | 123 |
| prepro-Galn D.rer | 71 | DFKTGALR--IADEDVVHTIIDFLSYLKLKEIGALD---SLPSSLTSEISQP  | 118 |
| Galn_mut          | 71 | I VTGASATNTDWQEREKCL                                  | 89  |

**Figure S2. Mapping of *npm* and details of *galr1A* and *galn* mutations, Related to Figure 4.** *npm* maps to chromosome 19 (A) as shown by the output of the SNPTrack software. In (B) a schematic representation of the *galr1A* gene is shown, exons are boxes, introns are not drawn to scale. The region of exon1 that is lost from the transcript by aberrant splicing in *npm* mutants is shown in orange. The CRISPR target site and the induced 4 bp deletion are indicated. (C) RT-PCR results showing a shorter transcript in *npm* mutants, primers used are indicated as arrows in (B). (D) protein sequence alignment of Galr1A from human and zebrafish wild-type, *npm* and *galr1A<sup>ko</sup>* mutants. Identical amino acid positions are indicated by asterisks, similarities by dots, the seven transmembrane regions are shaded in yellow. In *npm* 21 amino acids are missing. The k.o. allele has a premature stop. In (E) a schematic representation of the *galn* gene is shown, exons are boxes, introns are not drawn to scale. The CRISPR target site in exon 3 and the induced 7 bp deletion are displayed. (F) shows the protein sequence alignment of the Galn precursors (prepro-Galn) from human and zebrafish and the generated k.o. allele. Identical amino acid positions are indicated by asterisks, similarities by dots, the mature peptide is highlighted in yellow. The grey box covers the altered amino acids present in the k.o. allele.

**A**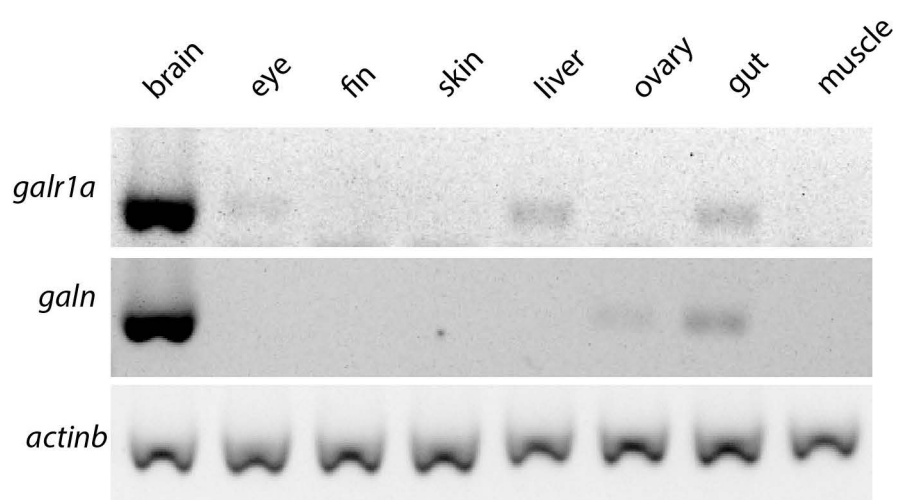**B**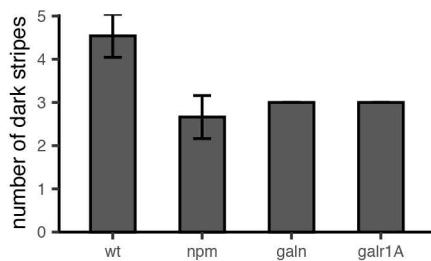**C**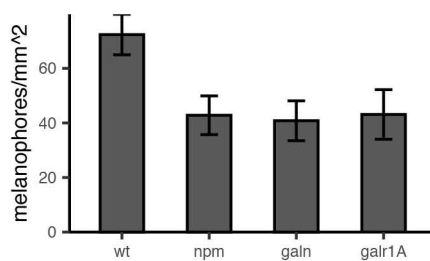**D**

```

prepro-Gal D.re 1 MHRCVGGVCSLIVC-AFLTETLGMVIAAKEKRGWTLNSAGYLLGPHAIDSHRSLSDKHGLAGKREMP-L 68
si-rp71-1c10.8 1 MQSSCALLCISLCVFTAHLSSIHGMTLMNPEKKGWTLSAGYLLGPYA---HRSLNVRHRASGKRDTGNE 67

prepro-Gal D.re 69 DEDFKTGALRIADEDVVHTIIDFLSYLKLKEIGALDSLP-SSLTSEEISQP 118
si-rp71-1c10.8 68 NSSFPTSSY---NDSYLLSILGHLAYLRLKEKGMTEDFSGSFINSGNVKQ- 114

```

**Figure S3. Expression of *galr1A* and *galn*, Related to Figure 4.** RT-PCR results showing the expression of *galr1A* and *galn* in different tissues of adult zebrafish (A). Both genes are highly expressed in the brain. The numbers of dark stripes (B) and the numbers of melanophores (C) in *npm*, *galn* and *galr1A* mutants are shown. (D) shows the alignment of prepro-Galn with the potential Galn-like peptide from zebrafish, si-rp71-1c10.8. Identical amino acid positions are indicated by asterisks, similarities by dots, the mature Galn-peptide is highlighted in yellow.

**A**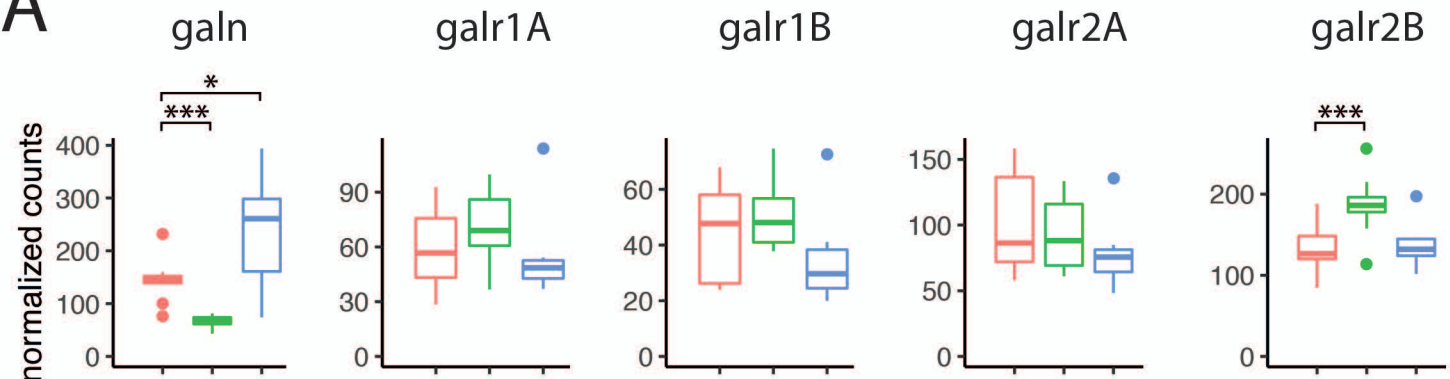**B**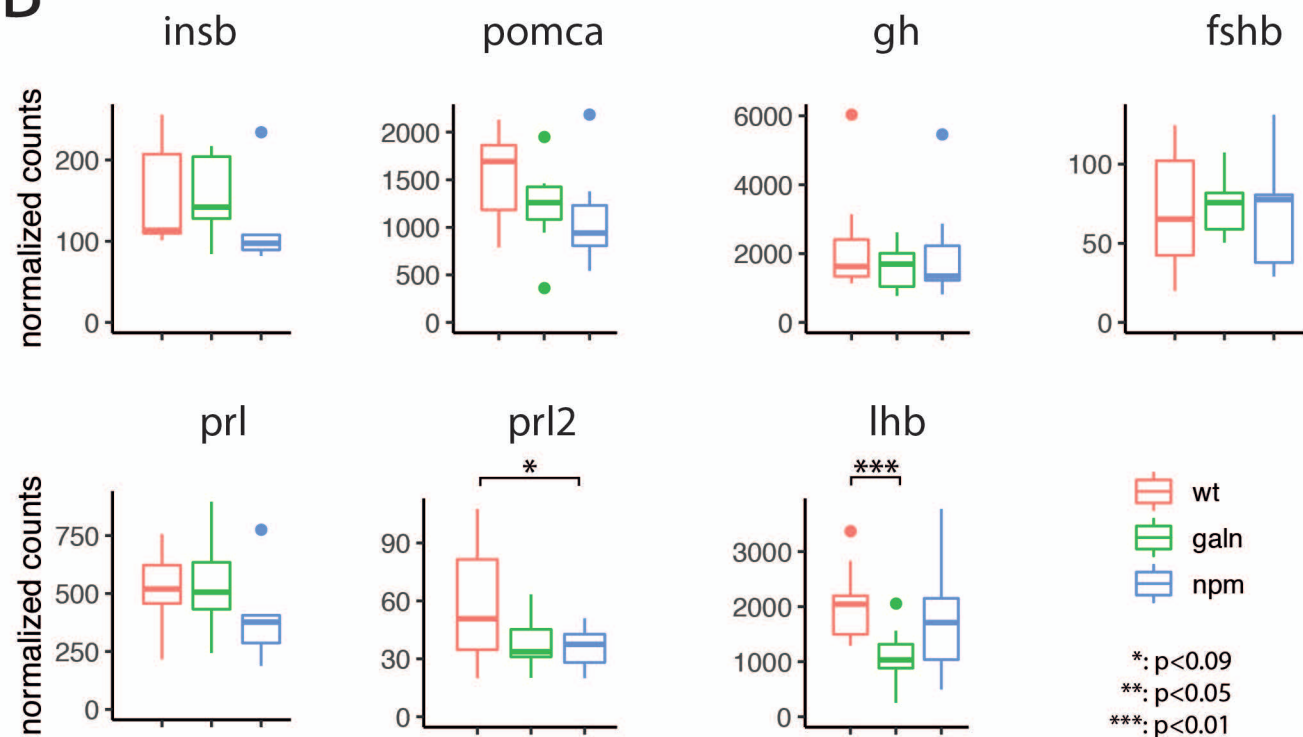



**Figure S4. Expression levels in *galn<sup>ko</sup>* and *npm* mutants, Related to Figure 4.** (A) *galn* and galanin receptor transcript abundance measured by Nanostring. *galn* levels are low in *galn<sup>ko</sup>* mutants, presumably due to nonsense-mediated decay; they are possibly upregulated in *npm* mutants. The expression of the different receptor genes is not changed in the mutants with the exception of *galr2B* in *galn<sup>ko</sup>*. The expression levels of hormones known to be influenced by Galanin signalling in mammals are mostly unchanged in *galn<sup>ko</sup>* and *npm* mutants (B). Only luteinizing hormone b and (possibly) prolactin2 are affected. The plots depict the mean values (horizontal line), the first and third quartiles (box) and the lowest and highest values no further than 1.5 x IQR (inter-quartile range) from the hinge (whiskers); outliers are plotted as individual points (\*:  $p < 0.09$ ; \*\*:  $p < 0.05$ ; \*\*\*:  $p < 0.01$ ).  $n=9$  for wild-type,  $n=8$  for *galn<sup>ko</sup>*,  $n=7$  for *npm*.

| Primer_name    | 5'-sequence-3'            | CRISPR Target site   |
|----------------|---------------------------|----------------------|
| galr1A_CRISPR1 | TAGGTGAAGATGCTTACGAGCA    | GGTGAAGATGCTTACGAGCA |
| galr1A_CRISPR2 | AAACTGCTCGTAAGCATCTTCA    |                      |
| galn_CRISPR1   | TAGGATGGACCCTGAACAGTGC    | GGATGGACCCTGAACAGTGC |
| galn_CRISPR2   | AAACGCACTGTTCAGGGTCCAT    |                      |
| galr1A_seq_f   | TCTGTCCTACCTGCTCTTC       |                      |
| galr1A_seq_r   | AAAGGCAATCCACCAACC        |                      |
| galn_seq_f     | GTGAATACATTTTGTGTAACAGG   |                      |
| galn_seq_r     | ACAAGGTAATAACAAGGATGAAATC |                      |
| galr1A_cdna_f  | GTCGCCTACTATCAGGGCAT      |                      |
| galr1A_cdna_r  | TTCAGGGGAAAGGAGCCAAAC     |                      |
| galn_cdna_f    | CAGAAACACTCGGGATGGTGA     |                      |
| galn_cdna_r    | CTTCTCGCCCCCTTGAC         |                      |

**Table S1. List of primers used in this study. Related to STAR Methods.**

| Gene Name | Accession      | Position  | Target Sequence                                                                                              |
|-----------|----------------|-----------|--------------------------------------------------------------------------------------------------------------|
| actb2     | NM_181601.3    | 1648-1747 | CCTGGGCATATTGTA AAAAGCTGTGTGGAACGTGGCGGTGCCAGACATTTGGTGGGGCCAACCTGTACTACTGACT<br>AATTC AATTCCAATAAAAAGTGACAT |
| galn      | NM_001346239.1 | 322-421   | GGCAGGAAAGAGAGAAAATGCCCTTAGATGAGGATTTCAAGACAGGAGCTCTGAGGATAGCAGATGAGGATGT<br>CGTCCATACCATCATTGACTTTCTTTCCG   |
| galr1a    | XM_691123.5    | 528-627   | AAAACAACAGTGATTTGGACAGACCTAGAAGCAACATAGACTTAGAAGCACCTGAAAAAACCTATTTGGCATC<br>GGCACAGACA ACTTAGTCACGCTTCT     |
| gapdh     | NM_001115114.1 | 490-589   | CTCACAGTTGTAAGCAATGCCTCCTGCACCACCAACTGCCTGGCTCCTTTGGCAAAGGTATCAATGATAACTTT<br>GTCATCGTTGAAGGTCTTATGAGCA      |
| tg        | NM_001329865.1 | 3086-3185 | TCTGTTGGTGTGTTGATGAAGAGGGTCAATACATCGCTGACTCTCTGACGTCTCGTTCTCACTACTCAGATGT<br>GCCAAACTTTATGCCAGAGGCTCCA       |
| trh       | NM_001012365.2 | 691-790   | GGTGAACGGACGCTTCAAGTGTTCGGGAAACACACCTGTCTCTCCATGTGCCAGTTTTCGAAGCGACAGTT<br>CAAAGCCTCATTCACTGTGACGCGT         |
| insb      | NM_001039064.1 | 127-226   | TTCTCCATCCAGCATCTGTGTGGTTCAAGCCTGGTGGATGCGCTTTACCTAGTGTGTGGCCTAGAGGTTTCTT<br>CTACACCAACAGAGGCCAGGAGAGAC      |
| tshba     | NM_181494.2    | 243-342   | TTTATTGTTTCAGAGGGGATGCACCTATCAGGAAGTTGAGTACCGGACAGCCGCTTTCGCCGGATGCCCTTCACA<br>TGCAGATCCTCACTCACCTACCCAG     |
| galr1b    | NM_001327843.1 | 672-771   | TAACCGGAGGAATGCGCTTATTGGCGTCTGTGTCATTTGGATGCTTTCTTTATCTTTGCCGTCCCGGTTGCTCAG<br>CACCAAATTTTGACGGATCACCCC      |
| galr2a    | XM_021480396.1 | 629-728   | CTCCAGGCCACTATCTACACCATGGACGAGTGGGTTTTTCGGCGGTTTCGTGTGCAAAGCCGTGCACCTTTATTAT<br>TACCTGACCATGTACGCGAGCATCT    |
| galr2b    | XM_021474712.1 | 1344-1443 | TGAAAATAAAGTGCACGGCTAATGATGCCTTACAGAAGCCTTATTTAAAAGAAAACACTCAAAGTGAGCCGGAG<br>GATTTCTGCAGCTTTGATCGACATCAC    |
| pomca     | NM_181438.3    | 916-1015  | AAGGGGGAGAGGTTGTTATAGGGGGATGTTTTGAATATACTTTCTCCAGCAAACCTCTGGATGAGAGGTTCC<br>TATCATGCATAGAAAACGAAGGTGGGC      |
| gh1       | NM_001020492.2 | 490-589   | ATGGACAGCCAAATATGGATGACAACGACTCCCTGCCGTTGCCTTTTGAGGATTTCTACCTGACCGTAGGGGAG<br>ACCAGTCTCAGAGAGAGCTTTCCGCT     |
| lhb       | NM_205622.2    | 435-534   | CCCGACTTCTGCATGTCCCAGAGAGAGGATTTCCCGCATACTAGACCTCGGACAACCTCACATCAACCTACACAC<br>ACAGTCGAGCTCAGCATTATTAGAC     |
| fshb      | NM_205624.1    | 261-360   | TGTACAAGAGCTACGAGTTAAAGGCTGCTCTGCAGGGGTTGATTCACTCTCGTGTACCCCGTGGCTCTGAGC<br>TGTGAGTGCAACCAGGTTAACTCAGA       |
| prl       | NM_181437.3    | 490-589   | CGTACACAAGATGGGCTCGTCTTCTGACAACCTGTCCACTCTCCGTTTAAATGGCAACAACCTTGGTCAGGATAA<br>AACGTCTCGACTTGTCAATTTCCAC     |
| prl2      | NM_001162854.1 | 576-675   | CCATGCTCCGATTTCTGACAGCGGAGAAGCCATGAGTGACTACGATCTCTCTACTGCTTTCCGCCGACTCCA<br>ACAAAGTCCAGA ACTATCTAAAAAT       |

**Table S2. List of transcripts and target sequences used for Nanostring expression profiling. Related to STAR Methods.**
